# Supplementary material for: The Association between Utilization of Media Information and Current Health Anxiety Among the Fukushima Daiichi Nuclear Disaster Evacuees
Source: Int J Environ Res Public Health. 2020 Jun 1;17(11):3921. doi: 10.3390/ijerph17113921 (PMC7312024; doi:10.3390/ijerph17113921)
Supplement: Supplementary file 1 [file ijerph-17-03921-s001.pdf]

**Supplementary Table S1. Characteristics of users of media relating to nuclear exposure (Forced evacuees)**

| Forced evacuees                                 | Any local media |        | Any national media |        | Public broadcasting (NHK) |        | Internet media |        | Public relations from local governments |        |  |
|-------------------------------------------------|-----------------|--------|--------------------|--------|---------------------------|--------|----------------|--------|-----------------------------------------|--------|--|
|                                                 | (n=112)         |        | (n=46)             |        | (n=76)                    |        | (n=24)         |        | (n=79)                                  |        |  |
|                                                 | n (%)           |        | n (%)              |        | n (%)                     |        | n (%)          |        | n (%)                                   |        |  |
|                                                 |                 |        |                    |        |                           |        |                |        |                                         |        |  |
| <i>Age (as of August 2016)</i>                  |                 |        |                    |        |                           |        |                |        |                                         |        |  |
| <40 years                                       | 10              | (8.9)  | 4                  | (8.7)  | 6                         | (7.9)  | 7              | (29.2) | 1                                       | (1.3)  |  |
| 40-64 years                                     | 55              | (49.1) | 20                 | (43.5) | 29                        | (38.2) | 16             | (66.7) | 41                                      | (51.9) |  |
| ≥65 years                                       | 47              | (42.0) | 22                 | (47.8) | 41                        | (53.9) | 1              | (4.2)  | 37                                      | (46.8) |  |
| <i>Gender</i>                                   |                 |        |                    |        |                           |        |                |        |                                         |        |  |
| Male                                            | 43              | (38.4) | 18                 | (39.1) | 29                        | (38.2) | 13             | (54.2) | 35                                      | (44.3) |  |
| Female                                          | 69              | (61.6) | 28                 | (60.9) | 47                        | (61.8) | 11             | (45.8) | 44                                      | (55.7) |  |
| <i>Education</i>                                |                 |        |                    |        |                           |        |                |        |                                         |        |  |
| Junior/ Senior high school                      | 82              | (74.5) | 32                 | (71.1) | 55                        | (73.3) | 10             | (41.7) | 60                                      | (76.9) |  |
| Vocational college, University, Graduate school | 28              | (25.5) | 13                 | (28.9) | 20                        | (26.7) | 14             | (58.3) | 18                                      | (23.1) |  |
| <i>Occupational category</i>                    |                 |        |                    |        |                           |        |                |        |                                         |        |  |
| Employed or owner                               | 43              | (39.1) | 9                  | (20.0) | 27                        | (37.0) | 14             | (58.3) | 25                                      | (32.5) |  |
| Suspended from job                              | 6               | (5.5)  | 3                  | (6.7)  | 3                         | (4.1)  | 1              | (4.2)  | 5                                       | (6.5)  |  |
| Unemployed                                      | 61              | (55.5) | 33                 | (73.3) | 43                        | (58.9) | 9              | (37.5) | 47                                      | (61.0) |  |

**Supplementary Table S2. Characteristics of users of media relating to nuclear exposure (Voluntary evacuees)**

| Voluntary evacuees             | Any local |        | Any national |        | Public       |        | Internet |        | Public     |        |
|--------------------------------|-----------|--------|--------------|--------|--------------|--------|----------|--------|------------|--------|
|                                | media     |        | media        |        | broadcasting |        | media    |        | relations  |        |
|                                |           |        |              |        | (NHK)        |        |          |        | from local |        |
|                                | (n=45)    |        | (n=17)       |        | (n=26)       |        | (n=30)   |        | (n=20)     |        |
|                                | n (%)     |        | n (%)        |        | n (%)        |        | n (%)    |        | n (%)      |        |
| <i>Age (as of August 2016)</i> |           |        |              |        |              |        |          |        |            |        |
| <40 years                      | 8         | (17.8) | 5            | (29.4) | 1            | (3.8)  | 13       | (43.3) | 4          | (20.0) |
| 40-64 years                    | 24        | (53.3) | 7            | (41.2) | 14           | (53.8) | 16       | (53.3) | 6          | (30.0) |
| ≥65 years                      | 13        | (28.9) | 5            | (29.4) | 11           | (42.3) | 1        | (3.3)  | 10         | (50.0) |
| <i>Gender</i>                  |           |        |              |        |              |        |          |        |            |        |
| Male                           | 19        | (42.2) | 5            | (29.4) | 11           | (42.3) | 11       | (36.7) | 10         | (50.0) |
| Female                         | 26        | (57.8) | 12           | (70.6) | 15           | (57.7) | 19       | (63.3) | 10         | (50.0) |
| <i>Education</i>               |           |        |              |        |              |        |          |        |            |        |
| Junior/ Senior high school     | 25        | (56.8) | 7            | (41.2) | 15           | (57.7) | 10       | (33.3) | 12         | (60.0) |

|                                                 |    |        |    |        |    |        |    |        |    |        |
|-------------------------------------------------|----|--------|----|--------|----|--------|----|--------|----|--------|
| Vocational college, University, Graduate school | 19 | (43.2) | 10 | (58.8) | 11 | (42.3) | 20 | (66.7) | 8  | (40.0) |
| <b>Occupational category</b>                    |    |        |    |        |    |        |    |        |    |        |
| Employed or owner                               | 30 | (68.2) | 8  | (47.1) | 19 | (76.0) | 25 | (83.3) | 13 | (65.0) |
| Suspended from job                              | 0  | (0.0)  | 0  | (0.0)  | 0  | (0.0)  | 0  | (0.0)  | 0  | (0.0)  |
| Unemployed                                      | 14 | (31.8) | 9  | (52.9) | 6  | (24.0) | 5  | (16.7) | 7  | (35.0) |

**Supplementary Table S3. Prevalence of current health anxiety due to radiation exposure**

|                                                         | Total      | Forced<br>evacuees | Voluntary<br>evacuees | p<br>value<br>( $\chi^2$ ) |
|---------------------------------------------------------|------------|--------------------|-----------------------|----------------------------|
|                                                         | (n=223)    | (n=155)            | (n=68)                |                            |
|                                                         | n (%)      | n (%)              | n (%)                 |                            |
| <i>Current health anxiety due to radiation exposure</i> |            |                    |                       |                            |
| Not at all                                              | 28 (12.6)  | 21 (13.5)          | 7 (10.3)              | 0.40<br>( $\chi^2=4.05$ )  |
| Only a little                                           | 47 (21.1)  | 32 (20.6)          | 15 (22.1)             |                            |
| Somewhat                                                | 105 (47.1) | 73 (47.1)          | 32 (47.1)             |                            |
| Very                                                    | 24 (10.8)  | 19 (12.3)          | 5 (7.4)               |                            |
| Extremely                                               | 19 (8.5)   | 10 (6.5)           | 9 (13.2)              |                            |
